# Supplementary material for: Evolutionary approaches for the reverse-engineering of gene regulatory networks: A study on a biologically realistic dataset
Source: Springer Nature journal article supplement (doi:10.1186/1471-2105-9-91), 2008-02-08

# Niching

# No Niching

A1

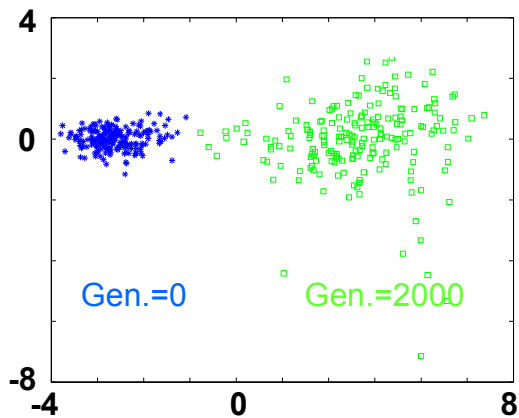

B1

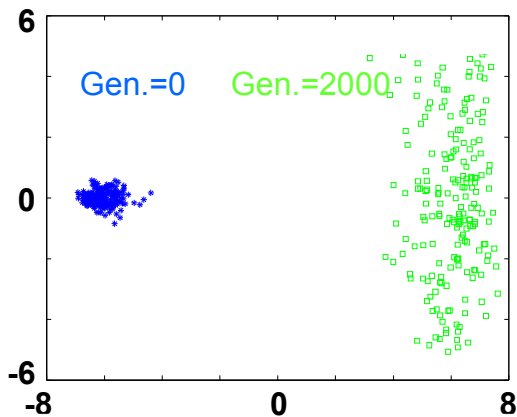

A2

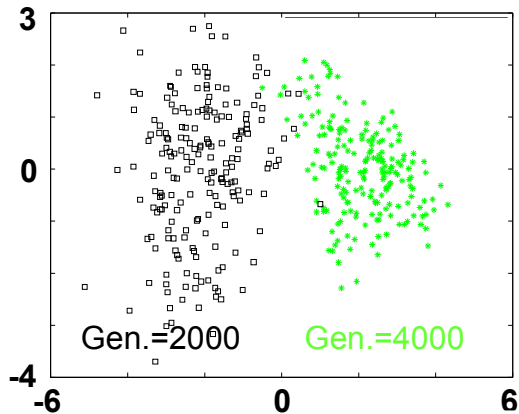

B2

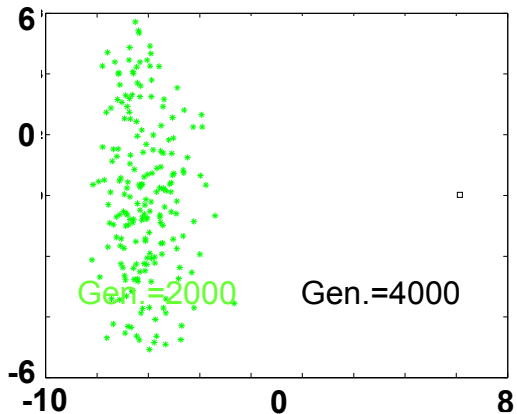

A3

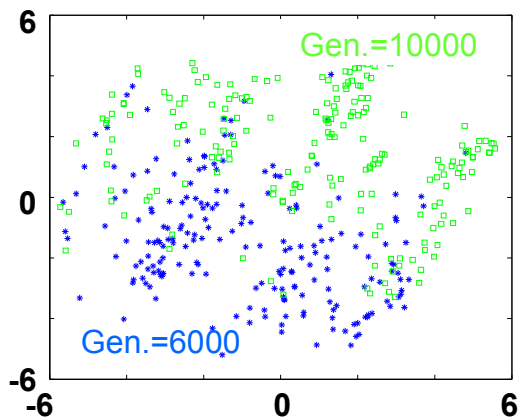

B3

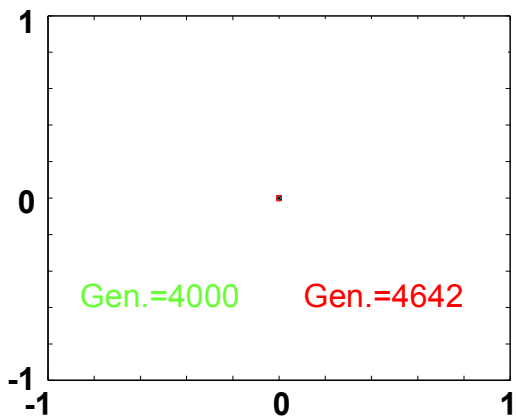

A4

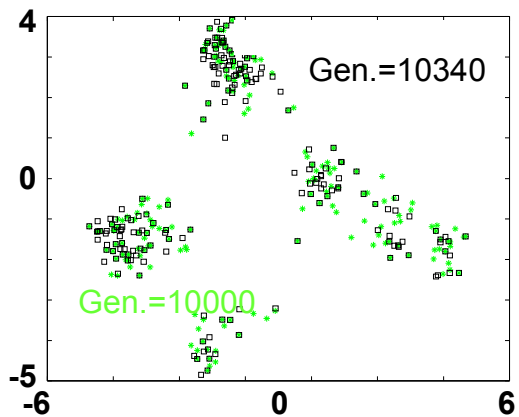

B4

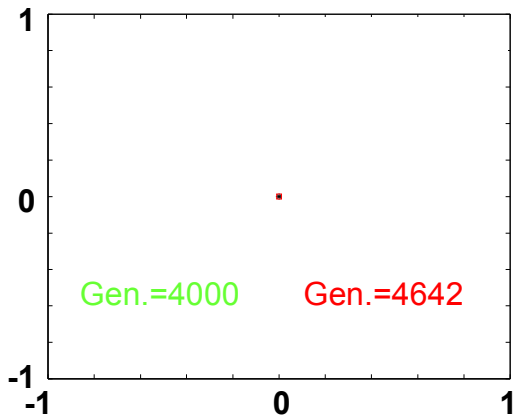

Supplement: 12859_2007_2076_MOESM2_ESM.pdf [file 12859_2007_2076_MOESM2_ESM.pdf]
