# Supplementary material for: Evolutionary approaches for the reverse-engineering of gene regulatory networks: A study on a biologically realistic dataset
Source: Springer Nature journal article supplement (doi:10.1186/1471-2105-9-91), 2008-02-08

A

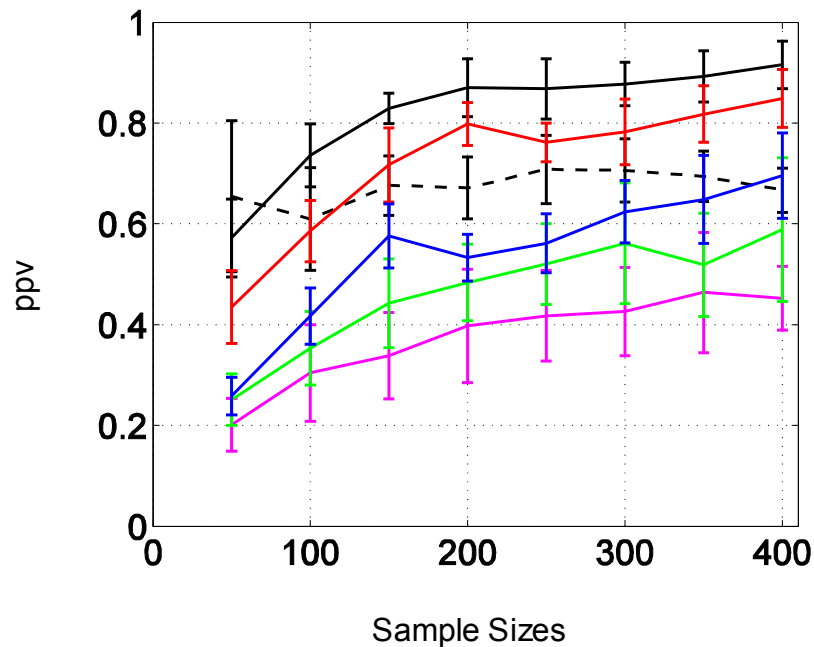

B

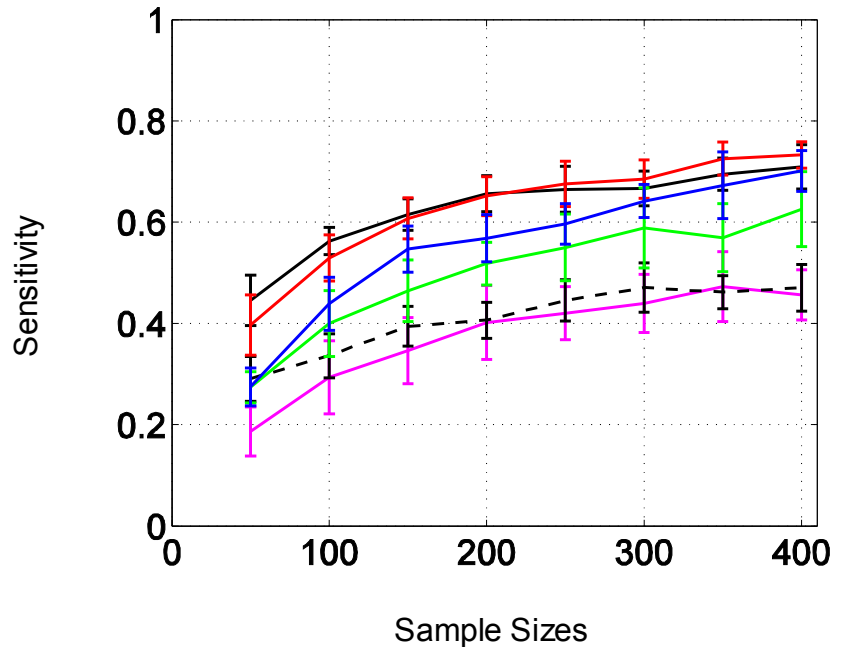

Supplement: 12859_2007_2076_MOESM4_ESM.pdf [file 12859_2007_2076_MOESM4_ESM.pdf]
